# Supplementary material for: Application of a Simplex–Centroid Mixture Design to Evaluate the Phenolic Compound Content and Antioxidant Potential of Plants Grown in Mexico
Source: MDPI journal article supplement (doi:10.3390/foods12183479), 2023-09-19
Supplement: s1 [file s1]

SUPPLEMENTARY MATERIAL

Table S1. Phenolic acids and flavonoids identified by HPLC in *O. oligacantha* (Förster) var. Ulapa.

| Phenolic acids<br>(µg/g DW) |                | <i>Opuntia joconostle</i><br>(Pericarp and meso-<br>carp) <sup>58</sup> | <i>Opuntia joconostle</i><br>F.A.C. Weber ex<br>Diguet var.<br>Cuaresmeño<br>(Epicarp) <sup>59</sup> | <i>Opuntia matudae</i> var.<br>Cuaresmeño<br>(Pericarp) <sup>60</sup> | <i>Opuntia matudae</i><br>Scheinvar var. Rosa<br>(Epicarp) <sup>61</sup> |
|-----------------------------|----------------|-------------------------------------------------------------------------|------------------------------------------------------------------------------------------------------|-----------------------------------------------------------------------|--------------------------------------------------------------------------|
| Gallic                      | 534.11 ± 0.05  |                                                                         |                                                                                                      | *                                                                     |                                                                          |
| Chlorogenic                 | 2305.66 ± 0.07 |                                                                         |                                                                                                      |                                                                       |                                                                          |
| Syringic                    | 265.53 ± 0.10  | *                                                                       |                                                                                                      |                                                                       |                                                                          |
| Vanillic                    | ND             | *                                                                       |                                                                                                      | *                                                                     |                                                                          |
| <i>p</i> -hydroxybenzoic    | ND             |                                                                         |                                                                                                      |                                                                       |                                                                          |
| Caffeic                     | ND             | *                                                                       |                                                                                                      |                                                                       | *                                                                        |
| Ferulic                     | 207.33 ± 0.02  |                                                                         | *                                                                                                    |                                                                       | *                                                                        |
| <i>p</i> -coumaric          | ND             |                                                                         |                                                                                                      |                                                                       |                                                                          |
| Total                       | 3312.63        |                                                                         |                                                                                                      |                                                                       |                                                                          |

(Cont.)

| Flavonoids<br>(µg/g DW) |                | <i>Opuntia joconostle</i><br>(Pericarp and<br>mesocarp) <sup>58</sup> | <i>Opuntia joconostle</i><br>F.A.C. Weber ex<br>Diguét var.<br>Cuaresmeño<br>(Epicarp) <sup>59</sup> | <i>Opuntia stricta</i> Haw;<br><i>undulata</i> Griff; <i>ficus</i><br><i>indica</i> L.<br>(All parts of the fruit) <sup>50</sup> | <i>Opuntia matudae</i><br>Scheinvar var. Rosa<br>(Epicarp) <sup>61</sup> |
|-------------------------|----------------|-----------------------------------------------------------------------|------------------------------------------------------------------------------------------------------|----------------------------------------------------------------------------------------------------------------------------------|--------------------------------------------------------------------------|
| Apigenin                | ND             |                                                                       |                                                                                                      |                                                                                                                                  |                                                                          |
| Rutin                   | 437.68 ± 0.01  |                                                                       |                                                                                                      |                                                                                                                                  |                                                                          |
| Phloridzin              | 2674.36 ± 0.12 |                                                                       |                                                                                                      |                                                                                                                                  |                                                                          |
| Myricetin               | ND             |                                                                       |                                                                                                      |                                                                                                                                  |                                                                          |
| Quercetin               | ND             | *                                                                     | *                                                                                                    | *                                                                                                                                | *                                                                        |
| Naringenin              | 1143.40 ± 0.06 |                                                                       |                                                                                                      |                                                                                                                                  |                                                                          |
| Phloretin               | ND             |                                                                       |                                                                                                      |                                                                                                                                  |                                                                          |
| Galangin                | 88.43 ± 0.17   |                                                                       |                                                                                                      |                                                                                                                                  |                                                                          |
| Total                   | 4343.87        |                                                                       |                                                                                                      |                                                                                                                                  |                                                                          |

The table presents data of the mean + SD (n=3) for the results found in this research in the samples of *Opuntia oligacantha* (Förster) var. Ulapa; \* Presence of phenolic acids and flavonoids identified in previous research for genera *Opuntia* spp; **ND**: not detected; **DW**: dry weight of raw material.
